# Supplementary material for: AgNPs supported over porous organic polymers for the fixation of CO2 on propargyl alcohols and amines under solvent-free conditions
Source: Royal Society of Chemistry journal article supplement (doi:10.1039/d2nj05794h), 2023-01-01
Supplement: d2nj05794h1.pdf [file d2nj05794h1.pdf]

## SUPPORTING INFORMATION

### **AgNPs supported over porous organic polymers for the fixation of CO<sub>2</sub> on propargyl alcohols and amines under solvent free conditions**

Amitesh Roy<sup>a</sup>, Najirul Haque<sup>a</sup>, Ritayan Chatterjee<sup>b</sup>, Surajit Biswas<sup>a</sup>, Asim Bhaumik<sup>c\*</sup>, Mitali Sarkar<sup>a\*</sup>, Sk. Manirul Islam<sup>a\*</sup>,

<sup>a</sup>*Department of Chemistry, University of Kalyani, Kalyani, Nadia, 741235, W.B., India. Email: mitaliku@gmail.com; manir65@rediffmail.com*

<sup>b</sup>*Department of Physics, Heritage Institute of Technology Kolkata, East Kolkata Township, Kolkata, 700107, India.*

<sup>c</sup>*School of Material Sciences, Indian Association for the Cultivation of Science, Kolkata 700 032, West Bengal, India. Email: msab@iacs.res.in*

| <b>Serial No.</b> | <b>Contents</b>                                                                      | <b>Pages</b> |
|-------------------|--------------------------------------------------------------------------------------|--------------|
| 1                 | Materials                                                                            | S2           |
| 2                 | Characterization Techniques                                                          | S2           |
| 3                 | characterisations                                                                    | S3-S4        |
| 4                 | <sup>1</sup> H NMR of Cyclic carbonates from propargyl alcohol and CO <sub>2</sub> . | S4-S8        |
| 5                 | <sup>1</sup> H NMR acyclic carbamates from amines, halides and CO <sub>2</sub> .     | S9-S15       |
| 6                 | Reference                                                                            | S15          |

## ***Materials***

All chemicals were purchased from commercially available sources and used as received without further purification. Solvents were distilled and dried through standard methods before use.

## ***Characterization Techniques***

A D8 Advance SWAX diffractometer from Bruker-AXS utilizing a constant current (40 mA) and voltage (40 kV) was used to obtain the powder XRD pattern of the AgNPs@TzTa-POP catalyst. The XRD machine was calibrated with silicon sample utilizing Ni-filtered Cu  $K_{\alpha}$  radiation ( $\lambda=0.15406$  nm). On a Perkin–Elmer FTIR 783 spectrophotometer the Fourier transform infrared (FTIR) spectra of the catalysts were recorded from 400 to 4000  $\text{cm}^{-1}$  using KBr pellets. Scanning electron microscope (SEM) (ZEISS EVO40, England) equipped with EDX facility was used to measure surface morphology of the AgNPs@TzTa-POP. BET surface area and porosity of these materials were estimated from the respective  $\text{N}_2$  sorption isotherms at 77 K by using a Quantachrome Instruments Autosorb-1C surface area analyzer. The samples were activated at 403 K under high vacuum for 12 h before the  $\text{N}_2$  adsorption–desorption analysis. TEM images were recorded using FEI Tecnai G2 F20 X-TWIN TEM at an accelerating voltage of 200 kV. HR-TEM, 5 mg of the AgNPs@TzTa-POP catalyst was dispersed into absolute EtOH under the application of sonication for 30 min, followed by the sample coating on a carbon coated copper TEM grid and dried in air. All spectra were taken at 400 MHz for  $^1\text{H}$  NMR. Using Bruker DPX-400 in  $\text{CDCl}_3$  instrument with TMS as internal standard the products was confirmed by  $^1\text{H}$  spectroscopy.

Characterisations

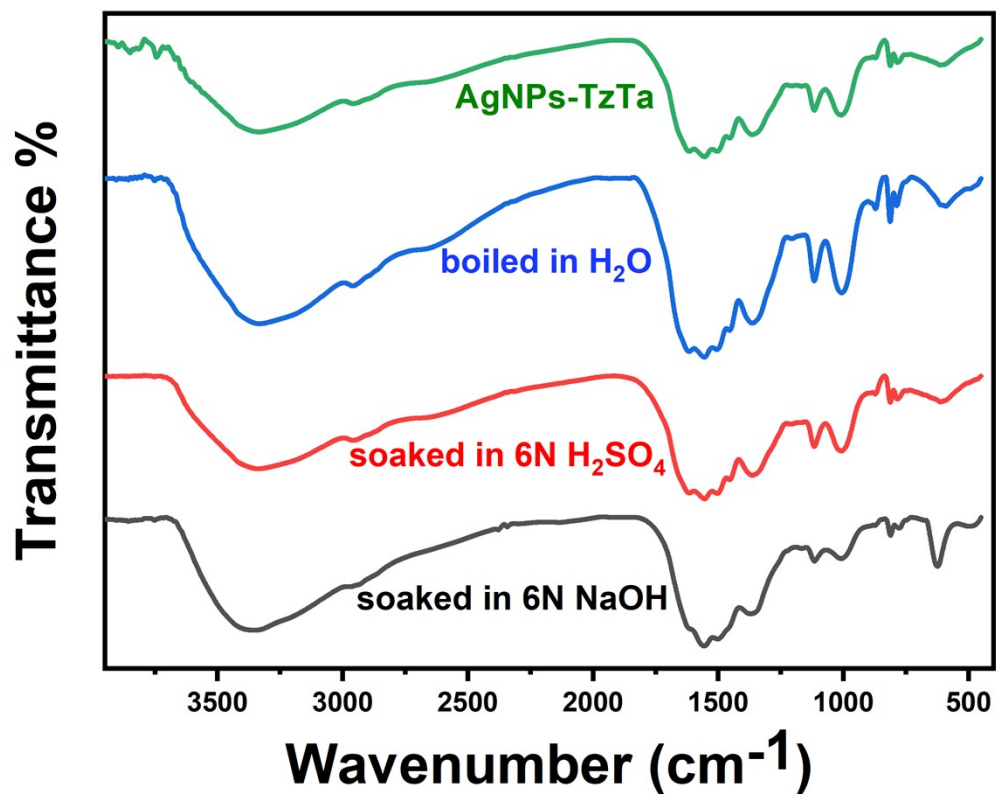

Fig. S1: IR of catalyst under different medium

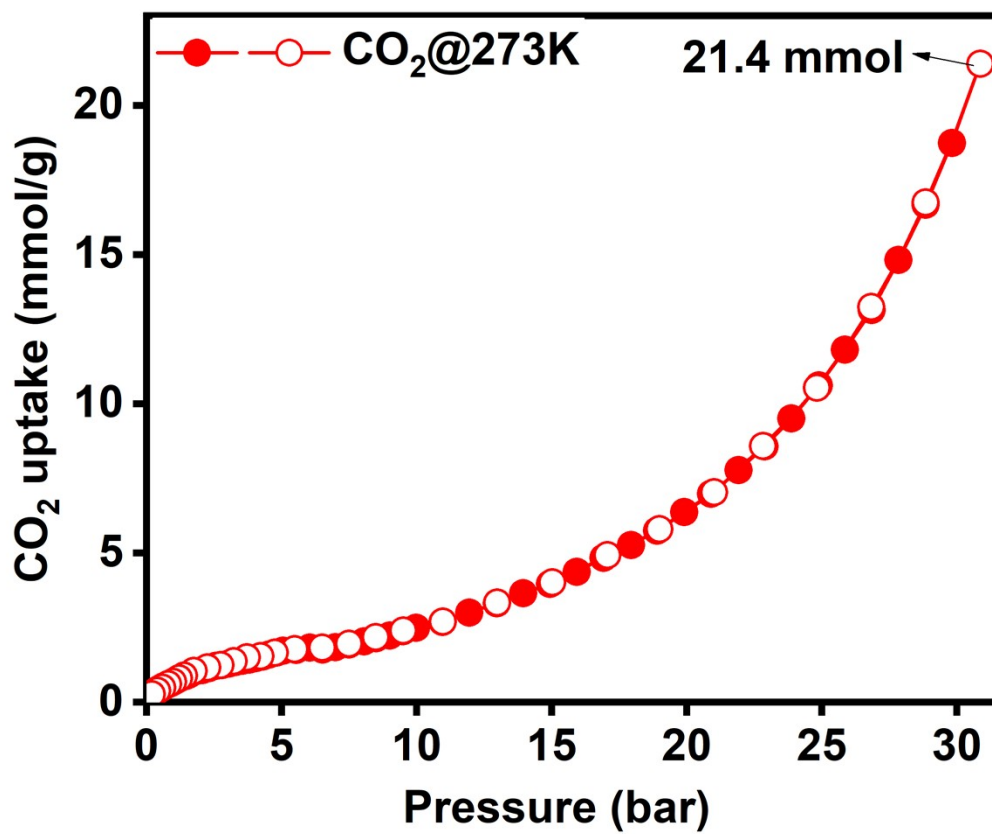

Fig. S2: CO<sub>2</sub> adsorption-desorption profile of AgNPs@TzTa-POP.

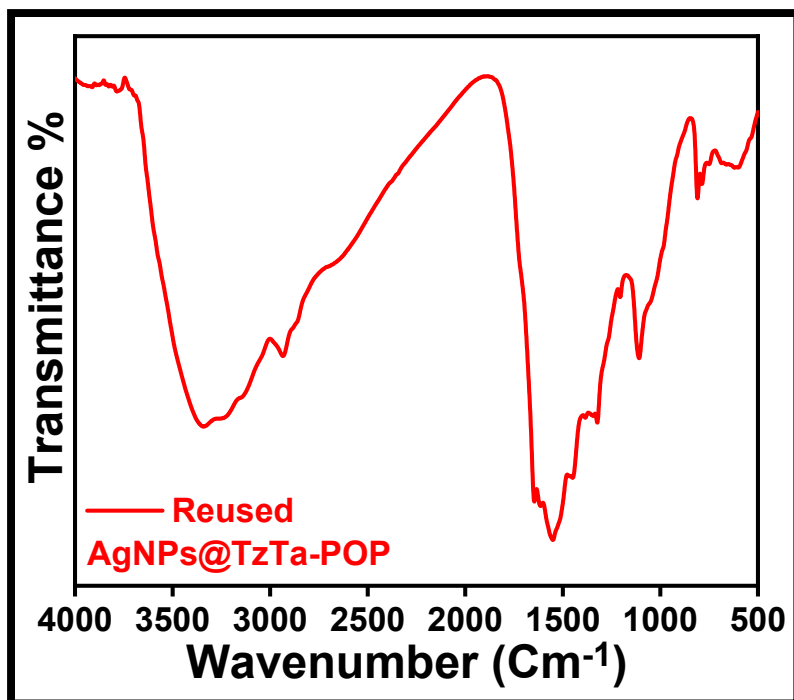

Fig. S3 : IR of reused catalyst AgNPs@TzTa-POP.

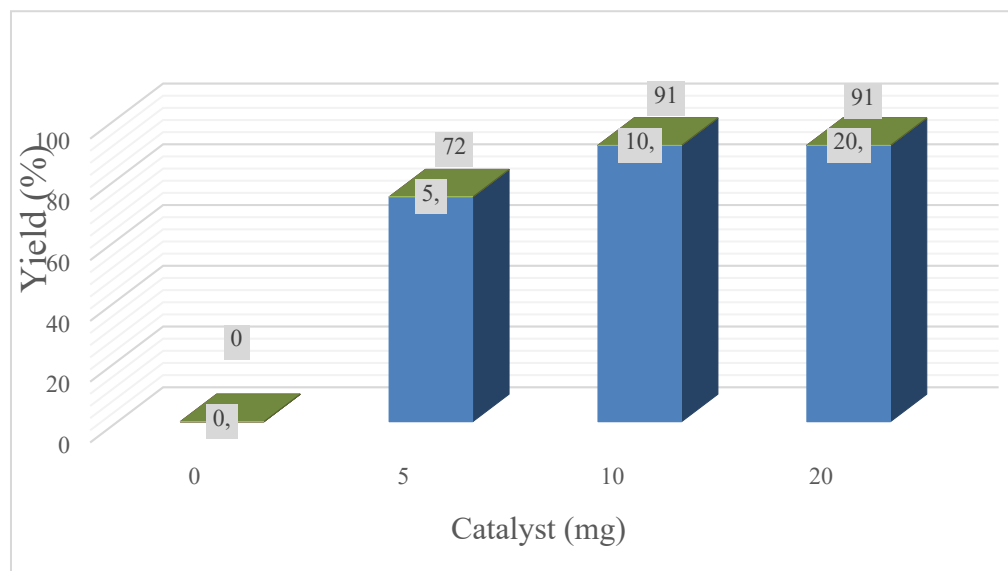

Fig. S4: Variation of catalyst loading on the carbamates formation reaction (reaction conditions: benzylamine (6 mmol), iodopropane (6 mmol), Cs<sub>2</sub>CO<sub>3</sub> (1.5 eq.), CO<sub>2</sub> balloon, RT, 8h) (Edit the figure: write Catalyst (mg) in X-axis and place the Yield (%) in Y-axis properly).

**SEM of reused catalyst AgNPs@TzTa-POP**

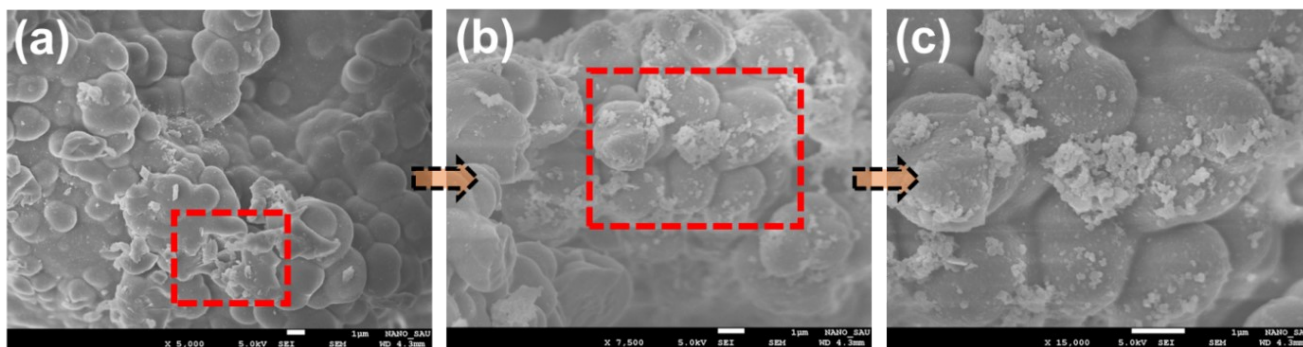

Fig S5 : SEM of reused catalyst AgNPs@TzTa-POP.

**Characterizations data of respective  $\alpha$ -alkylidene cyclic carbonates.<sup>1</sup>**

|                                                                                               |                                                                                                                                                                                                                                                                                                               |
|-----------------------------------------------------------------------------------------------|---------------------------------------------------------------------------------------------------------------------------------------------------------------------------------------------------------------------------------------------------------------------------------------------------------------|
| 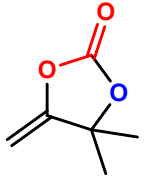 <p>2a</p>   | <p><b>[4,4-dimethyl-5-methylene-1,3-dioxolan-2-one]:</b> <sup>1</sup>H NMR (400 MHz, CDCl<sub>3</sub>): <math>\delta</math> (in ppm) 1.184 (s, 6H), 4.366 (d, <math>J</math> = 5.6 Hz, 1H), 4.663 (d, <math>J</math> = 5.6 Hz, 1H).</p>                                                                       |
|  <p>2c</p> | <p><b>[4-ethyl-4-methyl-5-methylene-1,3-dioxolan-2-one]:</b> <sup>1</sup>H NMR (400 MHz, CDCl<sub>3</sub>): <math>\delta</math> (in ppm) 1.183 (t, <math>J</math> = 4.0, 3H), 1.476 (s, 3H), 1.678-1.712 (m, 2H), 4.297 (d, <math>J</math> = 4.0 Hz, 1H), 4.608 (d, <math>J</math> = 4.0 Hz, 1H).</p>         |
|  <p>2d</p> | <p><b>[4-isobutyl-4-methyl-5-methylene-1,3-dioxolan-2-one]:</b> <sup>1</sup>H NMR (400 MHz, CDCl<sub>3</sub>): <math>\delta</math> (in ppm) 0.913-0.963 (m, 6H), 1.536 (s, 3H), 1.754-1.780 (m, 1H), 1.836-1.874 (m, 2H), 4.347 (d, <math>J</math> = 4.8 Hz, 1H), 4.683 (d, <math>J</math> = 4.8 Hz, 1H).</p> |
|  <p>2e</p> | <p><b>[4-methylene-1,3-dioxaspiro[4.5]decan-2-one]:</b> <sup>1</sup>H NMR (400 MHz, CDCl<sub>3</sub>): <math>\delta</math> (in ppm) 1.183-1.956 (m, 10H), 4.213 (d, <math>J</math> = 3.6 Hz, 1H), 4.689 (d, <math>J</math> = 4.0 Hz, 1H).</p>                                                                 |

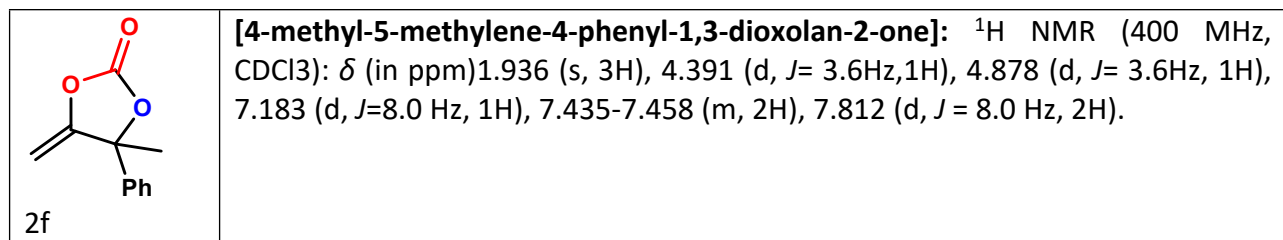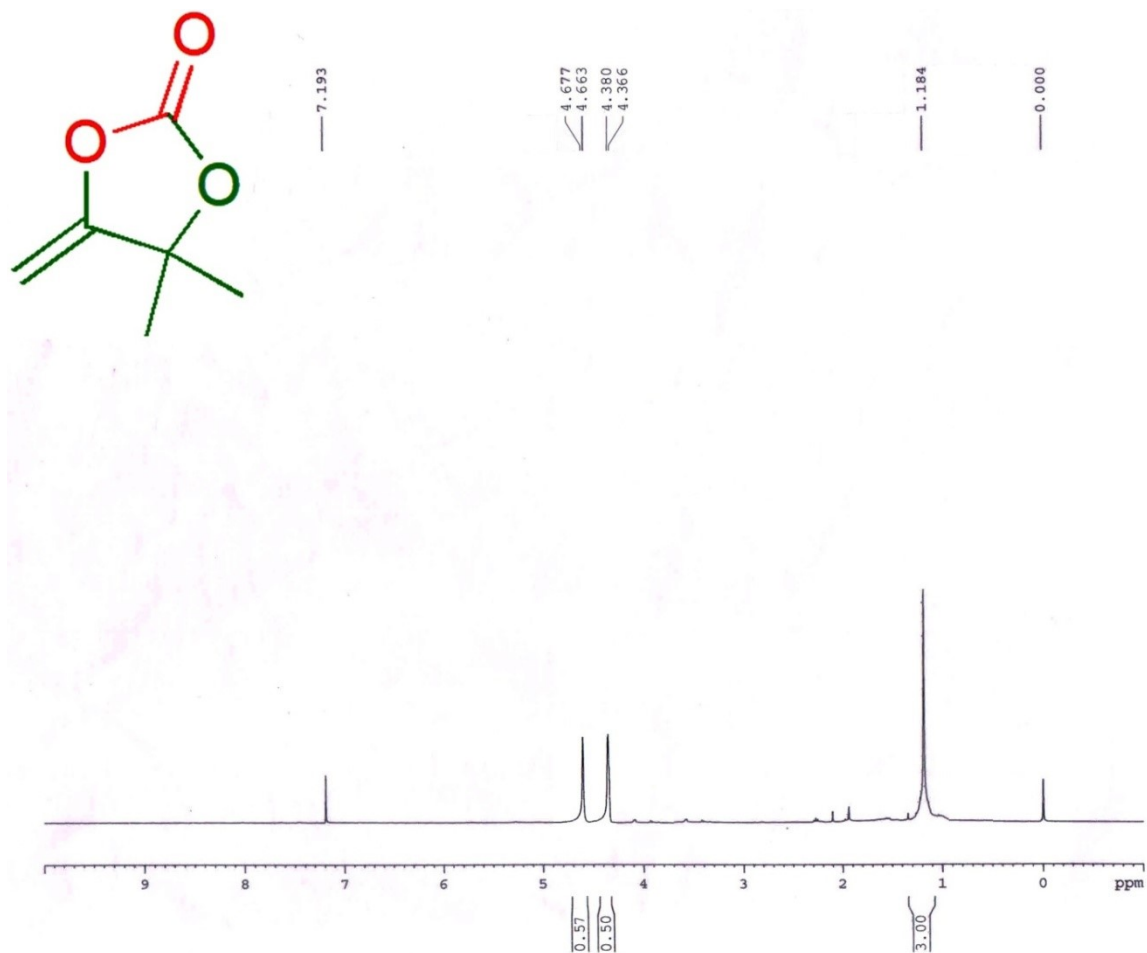

**Fig S6:**  $^1\text{H}$  NMR of 4,4-dimethyl-5-methylene-1,3-dioxolan-2-one.

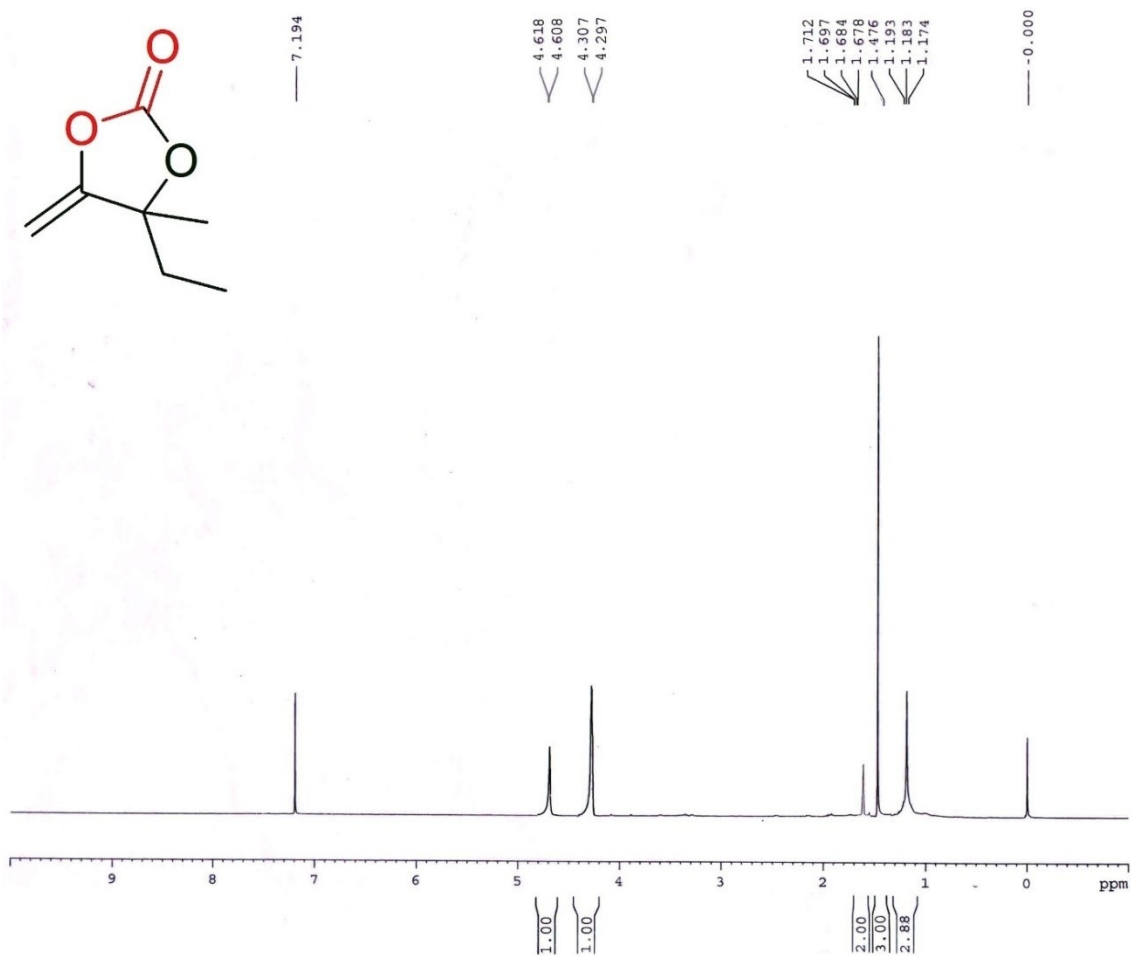

**Fig S7:** <sup>1</sup>H NMR of 4-ethyl-4-methyl-5-methylene-1,3-dioxolan-2-one.



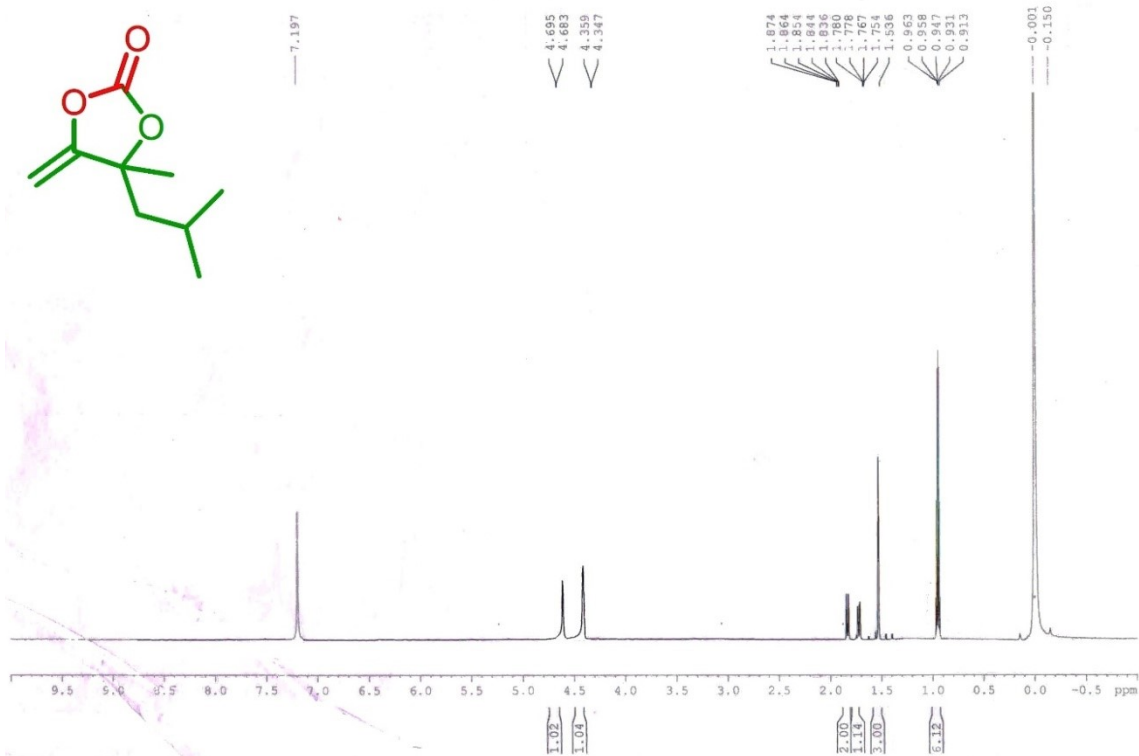

Figure S8: <sup>1</sup>H NMR of 4-ethyl-4-methyl-5-methylene-1,3-dioxolan-2-one.

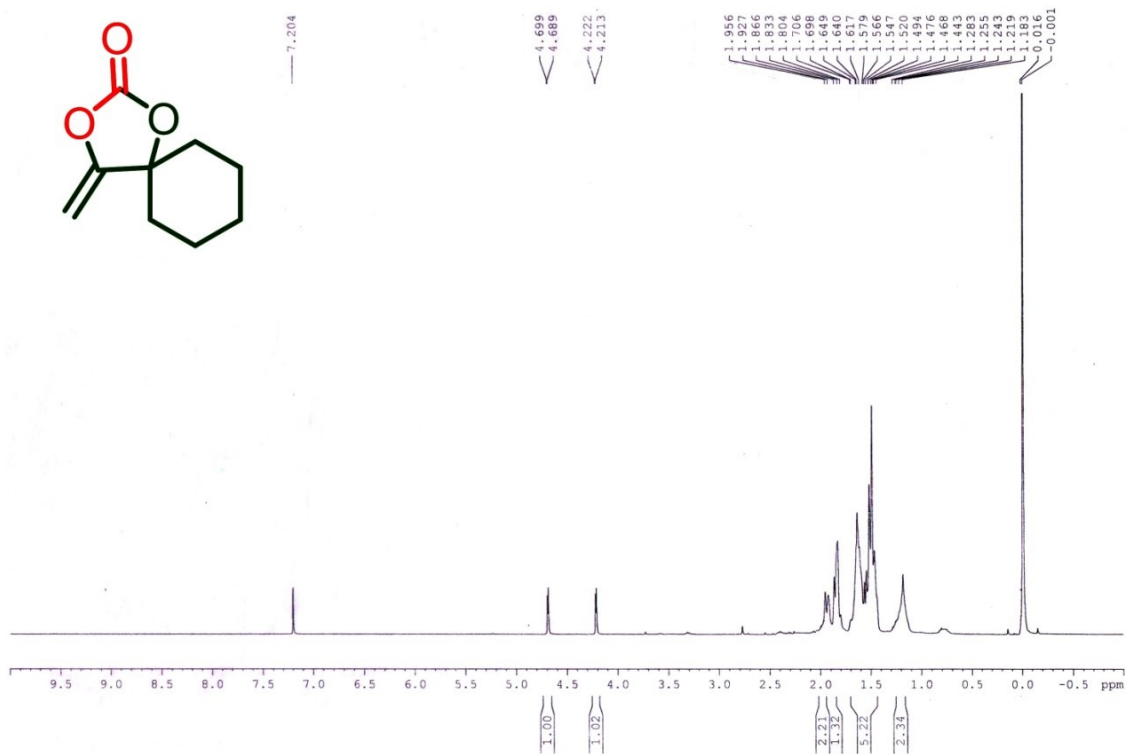

Fig S9: <sup>1</sup>H NMR of 4-methylene-1,3-dioxaspiro[4.5]decan-2-one.

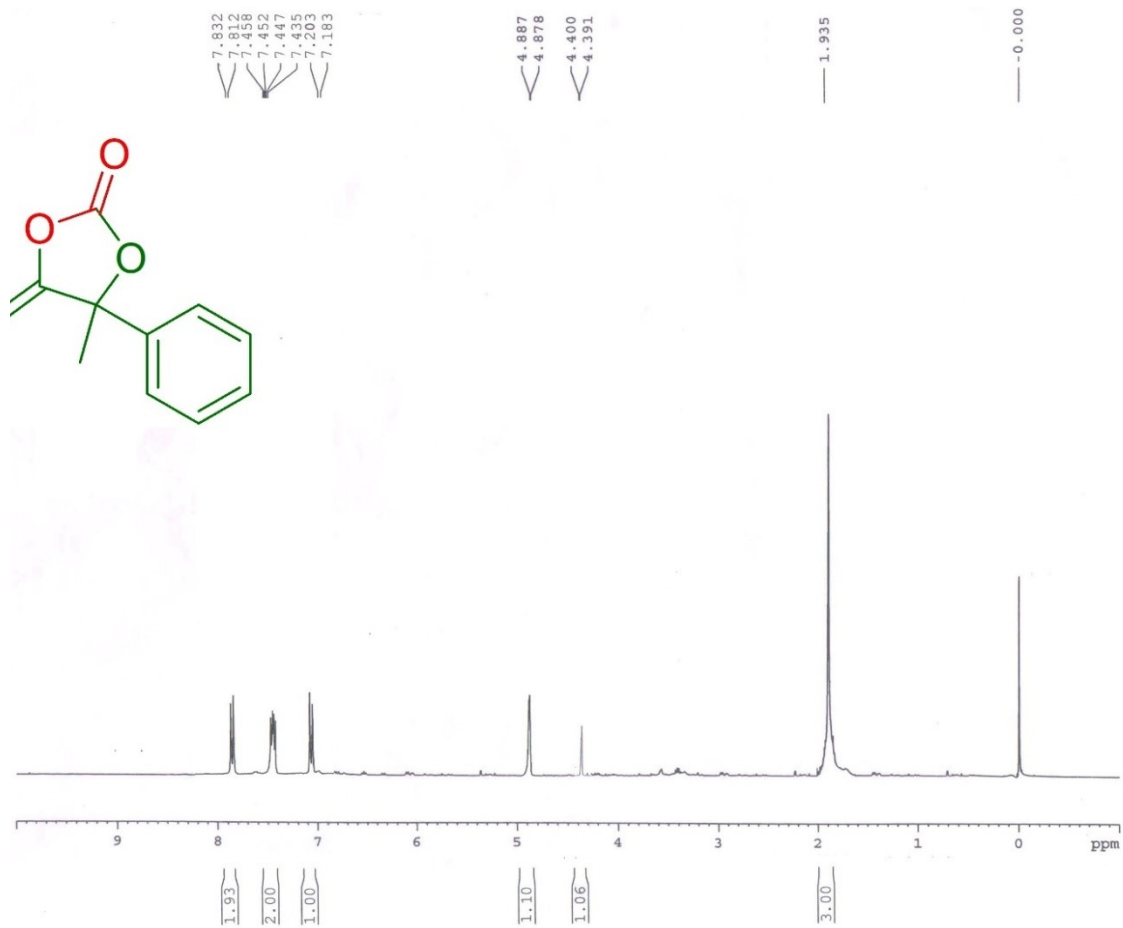

**Fig S10:** <sup>1</sup>H NMR of 4-methyl-5-methylene-4-phenyl-1,3-dioxolan-2-one.

**Characterizations data of respective isolated carbamates from amines, halides and CO<sub>2</sub>.<sup>2</sup>**

|                                                                                               |                                                                                                                                                                                                                                                                                                                  |
|-----------------------------------------------------------------------------------------------|------------------------------------------------------------------------------------------------------------------------------------------------------------------------------------------------------------------------------------------------------------------------------------------------------------------|
| 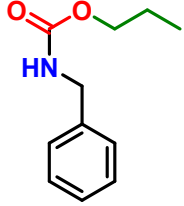 <p>5a</p>   | <p><b>Benzyl-carbamic acid propyl ester:</b><sup>1</sup>H NMR (400 MHz, CDCl<sub>3</sub>): δ (ppm) 1.541 (t, <i>J</i> = 6.8 Hz, 3H), 3.101 (s, 2H), 3.997-4.030 (m, 2H), 4.306 (t, <i>J</i> = 6.8 Hz, 2H), 5.938 (s, 1H), 7.268-7.382 (m, 2H), 7.640-7.690 (m, 1H), 7.778-7.802 (m, 2H).</p>                     |
|  <p>5b</p>   | <p><b>Benzyl-carbamic acid phenyl ester:</b><sup>1</sup>H NMR (400 MHz, CDCl<sub>3</sub>): δ (ppm) 4.291 (d, <i>J</i> = 6.0 Hz, 2H), 4.938 (s, 1H), 6.501-6.616 (m, 6H), 7.062-7.135 (m, 4H).</p>                                                                                                                |
|  <p>5c</p>  | <p><b>Propyl (4-methoxybenzyl) carbamate:</b><sup>1</sup>H NMR (400 MHz, CDCl<sub>3</sub>): δ (ppm) 1.388 (t, <i>J</i> = 6.8 Hz, 3H), 2.44-2.269 (m, 2H), 2.900 (t, <i>J</i> = 6.8 Hz, 2H), 3.561 (s, 3H), 4.104 (s, 2H), 4.669 (s, 1H), 7.229 (t, <i>J</i> = 7.6 Hz, 2H), 7.761 (t, <i>J</i> = 7.6 Hz, 2H).</p> |
|  <p>5d</p> | <p><b>Propyl (4-bromobenzyl) carbamate:</b><sup>1</sup>H NMR (400 MHz, CDCl<sub>3</sub>): δ (ppm) 1.522 (t, <i>J</i> = 7.2 Hz, 3H), 3.004 (t, <i>J</i> = 7.2 Hz, 2H), 3.156 (t, <i>J</i> = 7.6 Hz, 2H), 4.178 (s, 2H), 4.813 (s, 1H), 6.524-6.562 (m, 2H), 7.096-7.134 (m, 2H).</p>                              |
|  <p>5e</p> | <p><b>Phenyl-carbamic acid propyl ester:</b><sup>1</sup>H NMR (400 MHz, CDCl<sub>3</sub>): δ (ppm) 0.904 (t, <i>J</i> = 6.8 Hz, 3H), 1.587-1.659 (m, 2H), 4.048 (t, <i>J</i> = 6.8 Hz, 2H), 7.156-7.248 (m, 4H), 7.920 (s, 1H).</p>                                                                              |

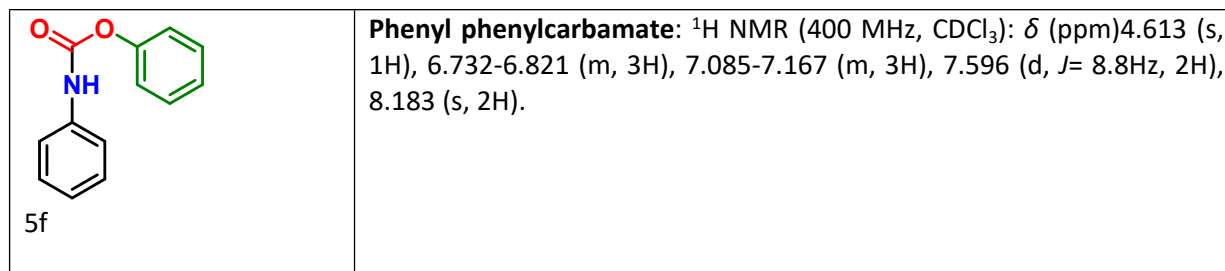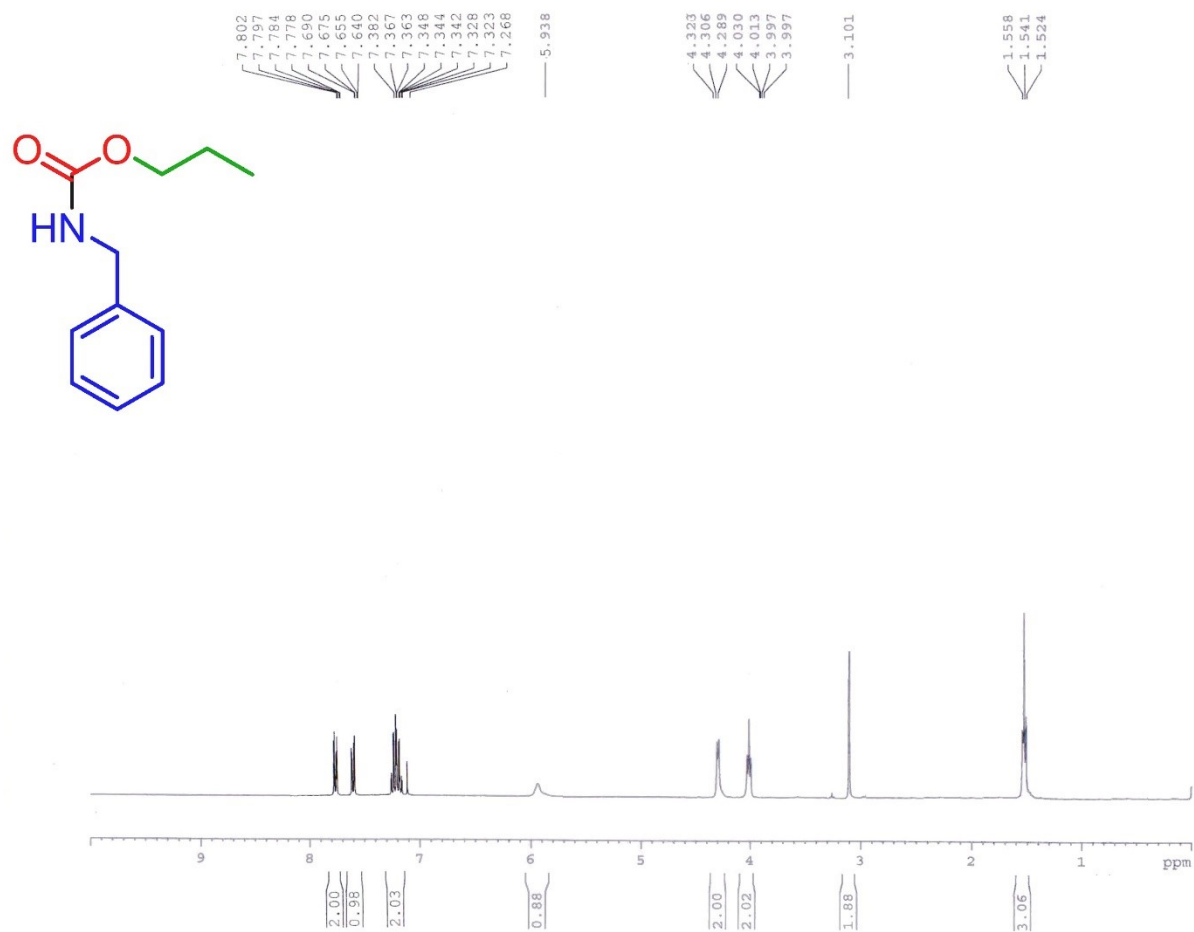

Fig S11:  $^1\text{H}$  NMR of Benzyl-carbamic acid propyl ester.

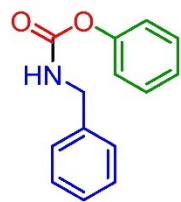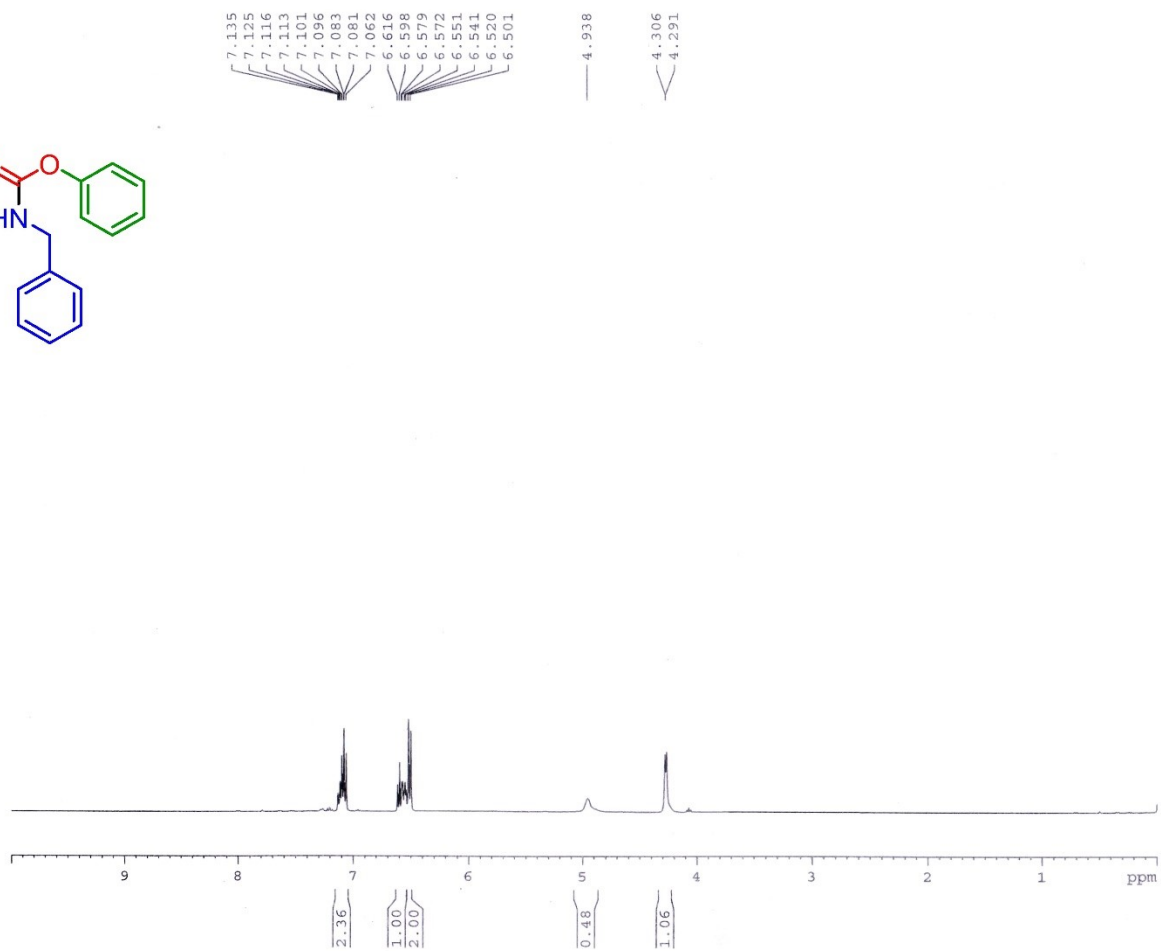

Fig S12:  $^1\text{H}$  NMR of Benzyl-carbamic acid phenyl ester.

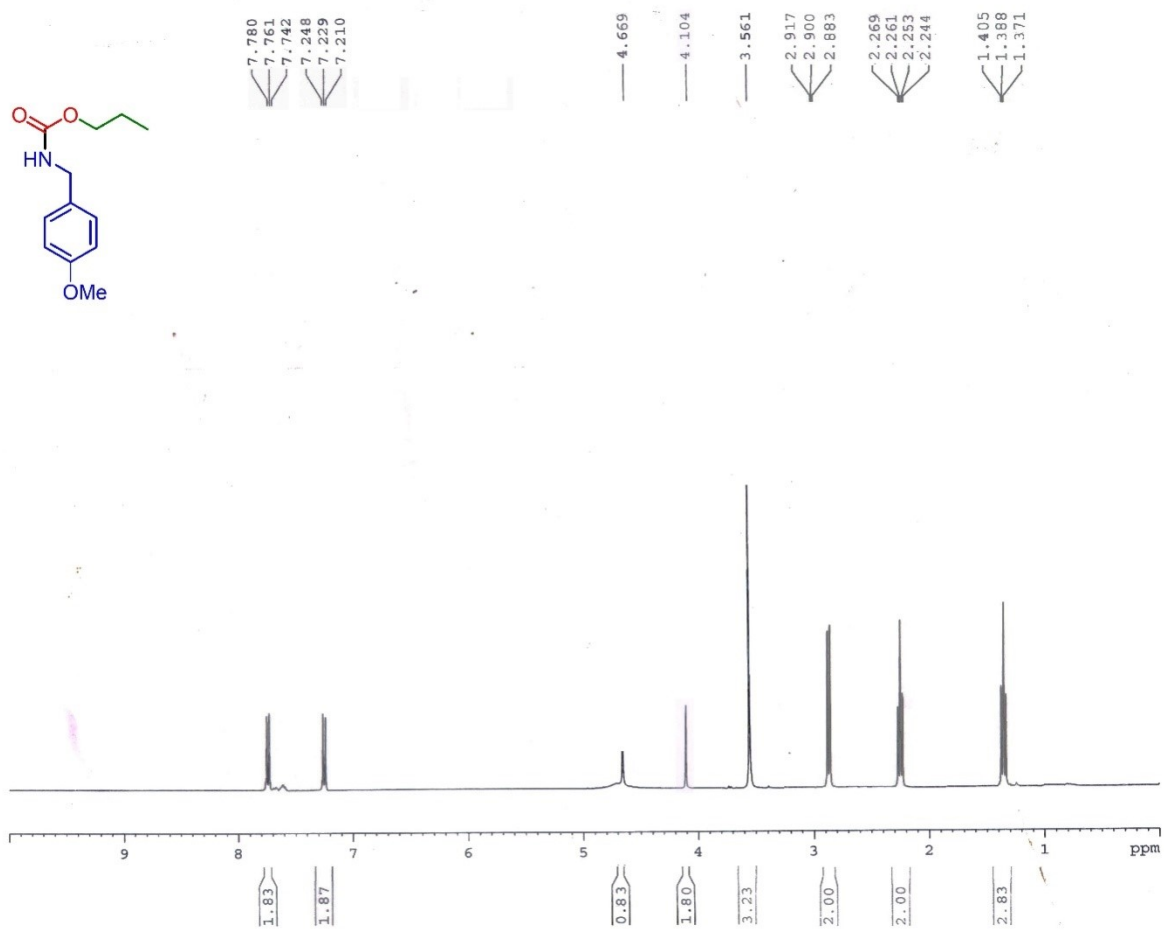

**Fig S13:** <sup>1</sup>H NMR of Propyl (4-methoxybenzyl) carbamate.

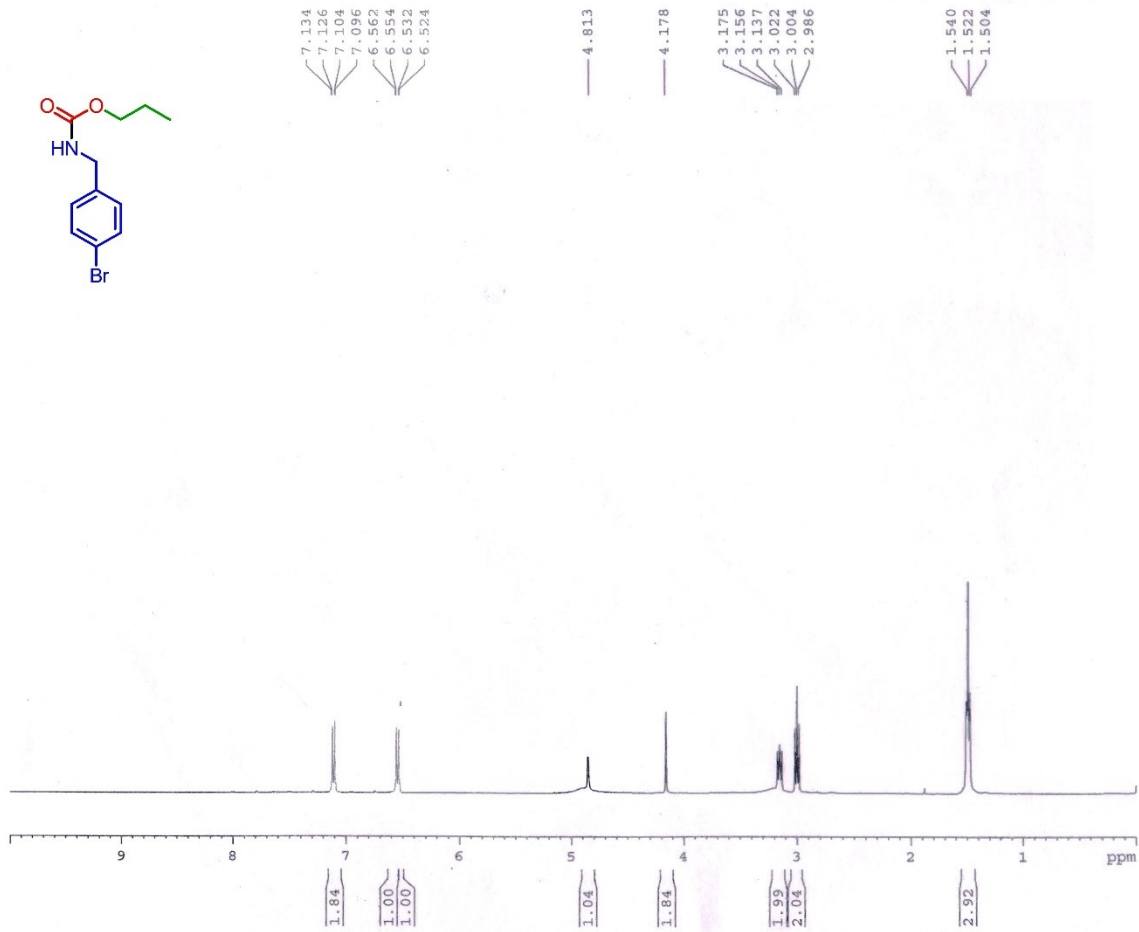

**Fig S14:** <sup>1</sup>H NMR of Propyl (4-bromobenzyl) carbamate.

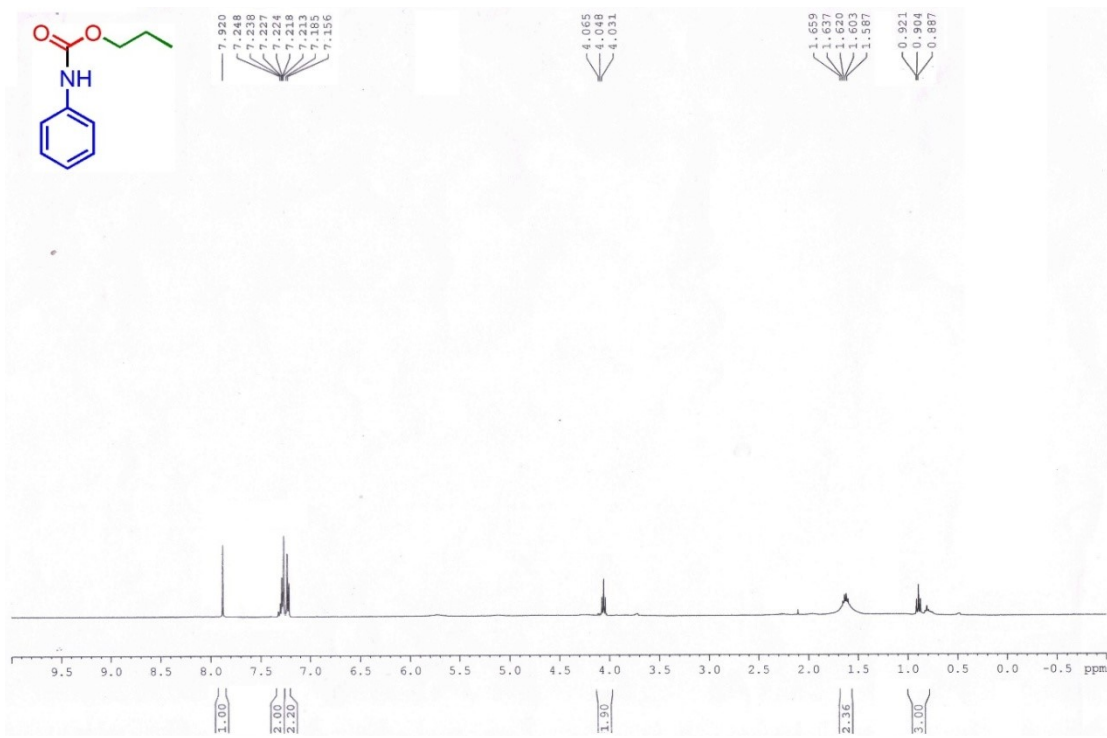

**Fig S15:** <sup>1</sup>H NMR of Phenyl-carbamic acid propyl ester.



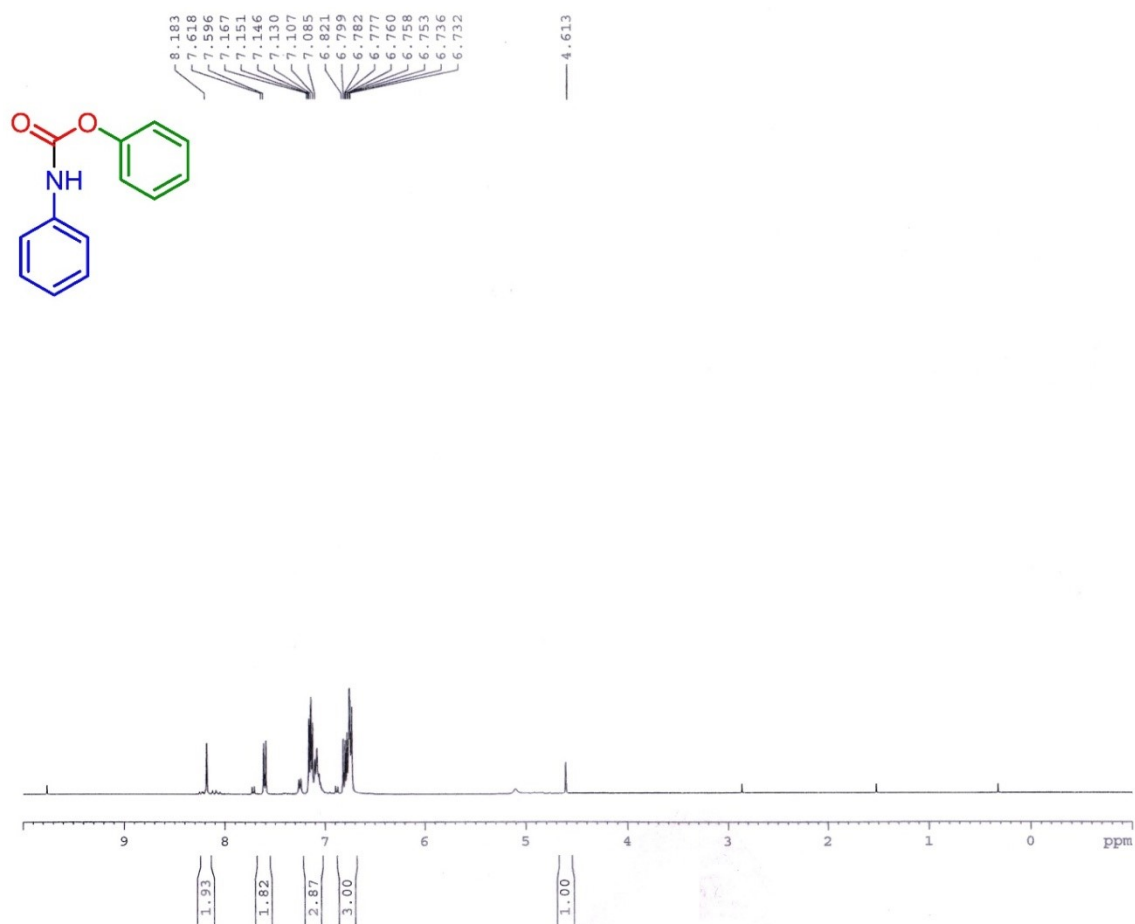

**Fig S16:** <sup>1</sup>H NMR of Phenyl phenylcarbamate.

## References

- [1] Z. Wu, X. Lan, Y. Zhang, M. Lia and G. Bai, *Dalton Trans.*,2019, **48**, 11063-11069.
- [2] R. Khatun, S. Biswas, S. Islam, I. H. Biswas, S. Riyajuddin, K. Ghosh, and S. M. Islam, *ChemCatChem.*,2019,**11**, 1303–1312.
